# Supplementary material
Source: PubMed Central journal article supplement (PMC4172345)
Supplement: NIHMS628024-supplement-supplement_1.pdf [file NIHMS628024-supplement-supplement_1.pdf]

## SUPPORTING INFORMATION

**Supp. Table S1. Predicted effects on protein function of GNE missense variants associated with GNE myopathy<sup>1</sup>**

| #  | hgNE1 <sup>2</sup> | hgNE2 <sup>2</sup> | PolyPhen2 <sup>3</sup> | SIFT <sup>4</sup> | Align <sup>5</sup> | PMut <sup>6</sup> | Overall <sup>7</sup> |
|----|--------------------|--------------------|------------------------|-------------------|--------------------|-------------------|----------------------|
| 1  | E2G                | E33G               | Probably Damaging      | Damaging          | 65                 | Neutral           | Severe               |
| 2  | R11W               | R42W               | Probably Damaging      | Damaging          | 65                 | Pathological      | Severe               |
| 3  | C13S               | C44S               | Possibly Damaging      | Damaging          | 65                 | Neutral           | Medium               |
| 4  | A26P               | A57P               | Benign                 | Tolerated         | 25                 | Neutral           | Mild                 |
| 5  | P27L               | P58L               | Possibly Damaging      | Tolerated         | 65                 | Neutral           | Medium               |
| 6  | P27S               | P58S               | Possibly Damaging      | Tolerated         | 65                 | Neutral           | Medium               |
| 7  | I28M               | I59M               | Possibly Damaging      | Damaging          | 0                  | Neutral           | Medium               |
| 8  | M29T               | M60T               | Possibly Damaging      | Damaging          | 65                 | Neutral           | Medium               |
| 9  | M29R               | M60R               | Probably Damaging      | Damaging          | 65                 | Pathological      | Severe               |
| 10 | E35K               | E66K               | Benign                 | Tolerated         | 55                 | Pathological      | Medium               |
| 11 | P36L               | P67L               | Probably Damaging      | Damaging          | 65                 | Neutral           | Severe               |
| 12 | E40K               | E71K               | Possibly Damaging      | Tolerated         | 55                 | Pathological      | Medium               |
| 13 | I51M               | I82M               | Probably Damaging      | Tolerated         | 0                  | Neutral           | Medium               |
| 14 | M60V               | M91V               | Benign                 | Tolerated         | 15                 | Neutral           | Mild                 |
| 15 | R71W               | R102W              | Probably Damaging      | Damaging          | 65                 | Pathological      | Severe               |
| 16 | G89R               | G120R              | Probably Damaging      | Damaging          | 65                 | Pathological      | Severe               |
| 17 | G89S               | G120S              | Probably Damaging      | Tolerated         | 55                 | Neutral           | Medium               |
| 18 | R101C              | R132C              | Probably Damaging      | Damaging          | 65                 | Neutral           | Severe               |
| 19 | R101H              | R132H              | Probably Damaging      | Damaging          | 25                 | Neutral           | Medium               |
| 20 | I106T              | I137T              | Possibly Damaging      | Damaging          | 65                 | Neutral           | Medium               |
| 21 | R129Q              | R160Q              | Probably Damaging      | Tolerated         | 35                 | Pathological      | Medium               |
| 22 | H132Q              | H163Q              | Probably Damaging      | Damaging          | 15                 | Neutral           | Medium               |
| 23 | G135V              | G166V              | Probably Damaging      | Damaging          | 65                 | Neutral           | Severe               |
| 24 | G136R              | G167R              | Probably Damaging      | Damaging          | 65                 | Pathological      | Severe               |
| 25 | I142T              | I173T              | Probably Damaging      | Damaging          | 65                 | Neutral           | Severe               |
| 26 | I150V              | I181V              | Probably Damaging      | Tolerated         | 25                 | Neutral           | Medium               |
| 27 | Y156H              | Y187H              | Probably Damaging      | Tolerated         | 65                 | Neutral           | Medium               |
| 28 | R162C              | R193C              | Probably Damaging      | Damaging          | 65                 | Pathological      | Severe               |
| 29 | M171V              | M202V              | Probably Damaging      | Damaging          | 15                 | Neutral           | Medium               |
| 30 | D176V              | D207V              | Possibly Damaging      | Tolerated         | 65                 | Neutral           | Medium               |
| 31 | R177C              | R208C              | Probably Damaging      | Damaging          | 65                 | Neutral           | Severe               |
| 32 | I178N              | I209N              | Probably Damaging      | Damaging          | 65                 | Pathological      | Severe               |
| 33 | I178M              | I209M              | Probably Damaging      | Damaging          | 0                  | Neutral           | Medium               |
| 34 | L179F              | L210F              | Probably Damaging      | Tolerated         | 15                 | Neutral           | Medium               |
| 35 | Y186C              | Y217C              | Probably Damaging      | Damaging          | 65                 | Pathological      | Severe               |
| 36 | D187G              | D218G              | Probably Damaging      | Damaging          | 65                 | Pathological      | Severe               |
| 37 | I200F              | I231F              | Benign                 | Damaging          | 15                 | Neutral           | Medium               |
| 38 | R202L              | R233L              | Benign                 | Damaging          | 65                 | Pathological      | Medium               |
| 39 | G206S              | G237S              | Possibly Damaging      | Tolerated         | 55                 | Neutral           | Medium               |
| 40 | D208N              | D239N              | Benign                 | Tolerated         | 15                 | Neutral           | Mild                 |
| 41 | D213V              | D244V              | Possibly Damaging      | Tolerated         | 65                 | Neutral           | Medium               |
| 42 | V216A              | V247A              | Probably Damaging      | Damaging          | 65                 | Neutral           | Severe               |
| 43 | Q219K              | Q250K              | Possibly Damaging      | Tolerated         | 45                 | Neutral           | Medium               |

|    |                    |                    |                   |           |    |              |        |
|----|--------------------|--------------------|-------------------|-----------|----|--------------|--------|
| 44 | D225N              | D256N              | Probably Damaging | Tolerated | 15 | Neutral      | Medium |
| 45 | F233S              | F264S              | Possibly Damaging | Damaging  | 65 | Neutral      | Medium |
| 46 | I241S              | I272S              | Benign            | Tolerated | 65 | Pathological | Medium |
| 47 | R246W              | R277W              | Probably Damaging | Damaging  | 65 | Pathological | Severe |
| 48 | R246Q              | R277Q              | Possibly Damaging | Tolerated | 35 | Neutral      | Mild   |
| 49 | M261V              | M292V              | Possibly Damaging | Tolerated | 15 | Neutral      | Mild   |
| 50 | M261I              | M292I              | Benign            | Tolerated | 0  | Neutral      | Mild   |
| 51 | M265T              | M296T              | Benign            | Damaging  | 65 | Neutral      | Medium |
| 52 | I270N              | I301N              | Possibly Damaging | Tolerated | 65 | Pathological | Medium |
| 53 | I270T              | I301T              | Benign            | Tolerated | 65 | Pathological | Medium |
| 54 | R277C              | R308C              | Probably Damaging | Tolerated | 65 | Pathological | Medium |
| 55 | R277G              | R308G              | Possibly Damaging | Tolerated | 65 | Pathological | Medium |
| 56 | P283S              | P314S              | Probably Damaging | Tolerated | 65 | Neutral      | Medium |
| 57 | H293R              | H324R              | Possibly Damaging | Damaging  | 25 | Pathological | Medium |
| 58 | G295D              | G326D              | Probably Damaging | Tolerated | 65 | Pathological | Medium |
| 59 | G295R              | G326R              | Probably Damaging | Tolerated | 65 | Pathological | Medium |
| 60 | M297T              | M328T              | Benign            | Damaging  | 65 | Pathological | Medium |
| 61 | I298T              | I329T              | Probably Damaging | Damaging  | 65 | Pathological | Severe |
| 62 | N300K              | N331K              | Probably Damaging | Damaging  | 65 | Neutral      | Severe |
| 63 | C303V              | C334V              | Possibly Damaging | Tolerated | 65 | Neutral      | Medium |
| 64 | G304R              | G335R              | Probably Damaging | Damaging  | 65 | Pathological | Severe |
| 65 | R306Q              | R337Q              | Probably Damaging | Tolerated | 35 | Pathological | Medium |
| 66 | A310P              | A341P              | Probably Damaging | Damaging  | 25 | Pathological | Severe |
| 67 | V315M              | V346M              | Probably Damaging | Damaging  | 15 | Neutral      | Medium |
| 68 | N317D              | N348D              | Probably Damaging | Tolerated | 15 | Neutral      | Medium |
| 69 | R321C              | R352C              | Probably Damaging | Damaging  | 65 | Pathological | Severe |
| 70 | V331A              | V362A              | Probably Damaging | Damaging  | 65 | Neutral      | Severe |
| 71 | H333R              | H364R              | Probably Damaging | Tolerated | 25 | Pathological | Medium |
| 72 | R335W              | R366W              | Probably Damaging | Damaging  | 65 | Pathological | Severe |
| 73 | L347P              | L378P              | Probably Damaging | Damaging  | 65 | Pathological | Severe |
| 74 | H348N <sup>8</sup> | H379N <sup>8</sup> | Benign            | Tolerated | 65 | Neutral      | Medium |
| 75 | V367I              | V398I              | Probably Damaging | Tolerated | 25 | Neutral      | Medium |
| 76 | D378Y              | D409Y              | Probably Damaging | Damaging  | 65 | Pathological | Severe |
| 77 | L379H              | L410H              | Probably Damaging | Damaging  | 65 | Neutral      | Severe |
| 78 | P390S              | P421S              | Probably Damaging | Tolerated | 65 | Pathological | Medium |
| 79 | V421A              | V452A              | Possibly Damaging | Tolerated | 65 | Neutral      | Medium |
| 80 | Y434C              | Y465C              | Possibly Damaging | Tolerated | 65 | Pathological | Medium |
| 81 | C453F              | C484F              | Possibly Damaging | Damaging  | 65 | Pathological | Severe |
| 82 | A460V              | A491V              | Possibly Damaging | Tolerated | 65 | Pathological | Medium |
| 83 | L463P              | L494P              | Probably Damaging | Damaging  | 65 | Pathological | Severe |
| 84 | G469R              | G00R               | Probably Damaging | Damaging  | 65 | Pathological | Severe |
| 85 | I472T              | I503T              | Possibly Damaging | Damaging  | 65 | Pathological | Severe |
| 86 | L508S              | L539S              | Probably Damaging | Damaging  | 65 | Neutral      | Severe |
| 87 | H509Y              | H540Y              | Possibly Damaging | Tolerated | 65 | Neutral      | Medium |
| 88 | P511H              | P542H              | Probably Damaging | Damaging  | 65 | Pathological | Severe |
| 89 | P511L              | P542L              | Probably Damaging | Damaging  | 65 | Pathological | Severe |
| 90 | N519S              | N550S              | Possibly Damaging | Tolerated | 45 | Pathological | Medium |
| 91 | A524V              | A555V              | Probably Damaging | Damaging  | 65 | Pathological | Severe |
| 92 | F528C              | F559C              | Probably Damaging | Damaging  | 65 | Pathological | Severe |
| 93 | L556S              | L587S              | Probably Damaging | Damaging  | 65 | Pathological | Severe |

|                                           |       |       |                   |           |    |              |        |
|-------------------------------------------|-------|-------|-------------------|-----------|----|--------------|--------|
| 94                                        | I557T | I588T | Possibly Damaging | Damaging  | 65 | Neutral      | Medium |
| 95                                        | G559R | G590R | Probably Damaging | Damaging  | 65 | Pathological | Severe |
| 96                                        | G559A | G590A | Probably Damaging | Damaging  | 55 | Neutral      | Severe |
| 97                                        | G568S | G599S | Probably Damaging | Damaging  | 55 | Neutral      | Severe |
| 98                                        | G568V | G599V | Probably Damaging | Damaging  | 65 | Pathological | Severe |
| 99                                        | V572L | V603L | Probably Damaging | Damaging  | 25 | Neutral      | Medium |
| 100                                       | G576E | G607E | Probably Damaging | Damaging  | 65 | Pathological | Severe |
| 101                                       | C579Y | C610Y | Probably Damaging | Tolerated | 65 | Pathological | Severe |
| 102                                       | C581R | C612R | Probably Damaging | Damaging  | 65 | Pathological | Severe |
| 103                                       | I587T | I618T | Benign            | Damaging  | 65 | Pathological | Medium |
| 104                                       | I587N | I618N | Possibly Damaging | Damaging  | 65 | Pathological | Medium |
| 105                                       | A591T | A622T | Probably Damaging | Damaging  | 55 | Neutral      | Severe |
| 106                                       | A600E | A631E | Probably Damaging | Damaging  | 65 | Pathological | Severe |
| 107                                       | A600T | A631T | Probably Damaging | Tolerated | 55 | Neutral      | Medium |
| 108                                       | L603F | L634F | Probably Damaging | Damaging  | 15 | Neutral      | Medium |
| 109                                       | A630T | A661T | Probably Damaging | Tolerated | 55 | Neutral      | Medium |
| 110                                       | A631T | A662T | Probably Damaging | Damaging  | 55 | Neutral      | Severe |
| 111                                       | A631V | A662V | Probably Damaging | Damaging  | 65 | Pathological | Severe |
| 112                                       | N635K | N666K | Probably Damaging | Damaging  | 65 | Neutral      | Severe |
| 113                                       | A648V | A679V | Probably Damaging | Tolerated | 65 | Pathological | Medium |
| 114                                       | I656N | I687N | Probably Damaging | Damaging  | 65 | Pathological | Severe |
| 115                                       | G669R | G700R | Probably Damaging | Damaging  | 65 | Pathological | Severe |
| 116                                       | Y675H | Y706H | Probably Damaging | Tolerated | 65 | Neutral      | Medium |
| 117                                       | V679G | V710G | Probably Damaging | Damaging  | 65 | Pathological | Severe |
| 118                                       | V696M | V727M | Probably Damaging | Damaging  | 15 | Neutral      | Medium |
| 119                                       | S699L | S730L | Probably Damaging | Damaging  | 65 | Pathological | Severe |
| 120                                       | G708S | G739S | Probably Damaging | Damaging  | 55 | Neutral      | Severe |
| 121                                       | M712T | M743T | Benign            | Damaging  | 65 | Pathological | Severe |
| <b>Frequent missense SNPs<sup>9</sup></b> |       |       |                   |           |    |              |        |
| 1                                         | D208E | D239E | Benign            | Tolerated | 35 | Neutral      | Mild   |
| 2                                         | I423V | I454V | Possibly Damaging | Tolerated | 25 | Neutral      | Mild   |
| 3                                         | V696L | V727L | Benign            | Tolerated | 25 | Neutral      | Mild   |

<sup>1</sup> See main text (**Table 1**) for sequence variants and literature references; Predicted effects on the protein calculated by each program are color-coded: **red** = severe; **yellow** = medium; **green** = mild/not deleterious.

<sup>2</sup> Variants are indicated in hGNE1 (NP\_005467.1) and hGNE2 (NP\_001121699.1) nomenclature. See main text and Table 1 footnotes for nomenclature details.

<sup>3</sup> **POLYPHEN 2**: POLYmorphism **PHEN**otyping program 2: (<http://genetics.bwh.harvard.edu/pph2/>). This program was used in January 2014, utilizing version 2.2.2 of the software, protein sequences from UniProtKB/UniRef100 Release 2011\_12 (14-Dec-2011), structures from PDB/DSSP Snapshot 03-Jan-2012 (78,304 entries) and UCSC MultiZ multiple alignments of 45 vertebrate genomes with hg19/GRCh37 human genome (08-Oct-2009) [Adzhubei et al., 2010].

<sup>4</sup> **SIFT**: Sort Intolerant From Tolerant human Protein: (<http://sift.jcvi.org/>) [Ng and Henikoff, 2003].

<sup>5</sup> **Align-GVGD**: ([http://agvgd.iarc.fr/agvgd\\_input.php](http://agvgd.iarc.fr/agvgd_input.php)) [Tavtigian et al., 2005; Mathe et al., 2006]. This program was used in January 2014 in the Align-GVGD version of 30/10/2013. Scores: <16 = mild; 16-34 = medium; >34 = severe.

<sup>6</sup> **PMut**: (<http://mmb2.pcb.ub.es:8080/PMut/>). This program was used in the PMut version available in January 2014 [Ferrer-Costa et al., 2004].

<sup>7</sup> Overall severity was scored by combining the scores of the 4 prediction programs:  
**Red (Severe)** when: 4 severe scores; 3 severe and 1 medium; 3 severe and 1 mild.  
**Green (Mild)** when: 4 mild scores; 3 mild and 1 medium; 2 mild and 2 medium.  
**Yellow (Medium)** when: any other combination of scores.

<sup>8</sup> Variant H379N (hGNE2) results from an indel sequence variant (L378del;H379N).

<sup>9</sup> As retrieved from exome databases. See text for details.

**Supp. Table S2. Predicted splicing effects of selected *GNE* variants**

| Variant<br>(NM_001128227.2)                                                | Location | Exp. splice effect? <sup>1</sup> | Predicted splicing effect <sup>2</sup> |     | References                                  |
|----------------------------------------------------------------------------|----------|----------------------------------|----------------------------------------|-----|---------------------------------------------|
|                                                                            |          |                                  | wt                                     | var |                                             |
| <b><i>Intronic variants</i></b>                                            |          |                                  |                                        |     |                                             |
| c.710-4A>G                                                                 | in 4     | ND                               | 67%                                    | 60% | [Cho et al., 2013]                          |
| c.862+4A>G                                                                 | in 5     | Yes                              | 92%                                    | 81% | [Nishino et al., 2002]                      |
| c.1076-1delG                                                               | in 6     | ND                               | 60%                                    | 82% | [Cho et al. 2013]                           |
| c.1163+2dupT                                                               | in 7     | Yes                              | 98%                                    | 99% | [Broccolini et al., 2004]                   |
| c.1504+5G>A                                                                | in 9     | ND                               | 90%                                    | 14% | [Cho et al., 2013]                          |
| c.1505-4G>A                                                                | in 9     | ND                               | 5%                                     | 9%  | [Cho et al., 2013]                          |
| c.1909+5G>A                                                                | in 11    | Yes                              | 16%                                    | 0%  | [Boyden et al., 2011]                       |
| <b><i>Exonic variants in proximity of splice junctions<sup>3</sup></i></b> |          |                                  |                                        |     |                                             |
| c.709G>A/p.G237S                                                           | ex 4     | ND                               | 100%                                   | 94% | [Broccolini et al., 2004]                   |
| c.710delG/p.G237Vfs*3                                                      | ex 5     | ND                               | 100%                                   | 12% | [Broccolini et al., 2004]                   |
| c.715G>A/p.D239N                                                           | ex 5     | ND                               | 31%                                    | 30% | [Sim et al., 2013]                          |
| c.1508T>C/p.I503T                                                          | ex 10    | ND                               | 5%                                     | 5%  | [Nishino et al. 2002;<br>Yabe et al., 2003] |
| c.1727delG/p.G576Efs*11                                                    | ex 11    | ND                               | 88%                                    | 95% | [Park et al., 2012]                         |

Severity predictions are visualized in the same colors as in **Supp. Table S1**.

**Red** (Severe), **Yellow** (Medium), **Green** (Mild).

The DNA numbering is based on cDNA sequence of the longest mRNA splice variant NM\_001128227.2 (encoding hGNE2 protein). Nucleotide numbering uses +1 as the A of the ATG translation initiation codon, with the initiation codon as codon 1.

<sup>1</sup>Experimental (exp) splice site effect: as reported in literature; ND = Not Done. Yes= Splice site effect was demonstrated experimentally.

<sup>2</sup>Using Human Splice Site Prediction by Neural Network ([http://www.fruitfly.org/seq\\_tools/splice.html](http://www.fruitfly.org/seq_tools/splice.html)), comparing wild type (wt) sequence to variant (var) sequence. The NNSPLICE 0.9 version (January 1997) of this splice site predictor was used (in January 2014) [Reese et al., 1997].

<sup>3</sup>Exonic cDNA variants resulting in protein variants located within 5-bp from a splice junction are listed.

**Supp. Table S3. Allele frequency of *GNE* variants in exome databases**

| Variants (NM_001128227.2)              |                     |                    | Frequency per database |                       |                       | Total                 |
|----------------------------------------|---------------------|--------------------|------------------------|-----------------------|-----------------------|-----------------------|
| hgNE2                                  | cDNA                | Name               | 1000 Genomes           | ESP                   | NIH-UDP               |                       |
| p.Q14Rfs*3                             | c.41_42delAA        | TMP_ESP_9_36276997 | -                      | 1/10620*              | -                     | 1/10620               |
| p.N23I                                 | c.68A>T             | rs199965140        | 1/2184                 | -                     | -                     | 1/2184                |
| p.R50H                                 | c.149G>A            | NA                 | -                      | -                     | 1/1434                | 1/1434                |
| p.L56F                                 | c.166C>T            | rs373398528        | -                      | 1/13006               | -                     | 1/13006               |
| p.R108S                                | c.324G>T            | rs141892824        | -                      | 1/13006               | -                     | 1/13006               |
| p.L126M                                | c.376C>A            | TMP_ESP_9_36246361 | -                      | 1/13006               | -                     | 1/13006               |
| p.R132H                                | c.395G>A            | rs144727134        | -                      | 1/13006               | -                     | 1/13006               |
| p.R132C                                | c.394C>T            | rs148523065        | -                      | 1/13006               | -                     | 1/13006               |
| p.R160*                                | c.479C>T            | rs372872777        | -                      | 1/13006               | -                     | 1/13006               |
| p.D207V                                | c.620A>T            | rs139425890        | 2/2184                 | -                     | -                     | 2/2184                |
| p.I231F                                | c.691A>T            | TMP_ESP_9_36246046 | -                      | 1/13006               | -                     | 1/13006               |
| <b>p.D239E</b>                         | <b>c.717T&gt;G</b>  | <b>rs35224402</b>  | <b>11/2184</b>         | <b>60/13006</b>       | <b>-</b>              | <b>71/15290</b>       |
| p.A287T                                | c.859G>A            | TMP_ESP_9_36236832 | -                      | 1/13006               | -                     | 1/13006               |
| p.R294*                                | c.580C>T            | rs200643106        | 1/2184                 | -                     | -                     | 1/2184                |
| p.R366W                                | c.1096C>T           | rs150132839        | -                      | 1/13006               | -                     | 1/13006               |
| p.D409Y                                | c.1276G>T           | rs199877522        | -                      | 3/13006               | -                     | 3/13006               |
| p.V443I                                | c.1327G>A           | TMP_ESP_9_36227292 | -                      | 1/13006               | -                     | 1/13006               |
| <b>p.I454V</b>                         | <b>c.1360A&gt;G</b> | <b>rs35638832</b>  | <b>1/2184</b>          | <b>8/13006</b>        | <b>-</b>              | <b>9/15290</b>        |
| p.F468S                                | c.1403T>C           | TMP_ESP_9_36223471 | -                      | 1/13004               | -                     | 1/13004               |
| p.I480V                                | c.1438A>G           | TMP_ESP_9_36223436 | -                      | 1/13004               | -                     | 1/13004               |
| p.Q482*                                | c.1444C>T           | rs189454495        | 1/2184                 | -                     | -                     | 1/2184                |
| p.R512Q                                | c.1535G>A           | rs138357804        | 1/2184                 | 2/13006               | -                     | 3/15290               |
| p.P534R                                | c.1601C>G           | TMP_ESP_9_36222899 | -                      | 1/13006               | -                     | 1/13006               |
| p.G564E                                | c.1691G>A           | rs201808007        | 1/2184                 | -                     | -                     | 1/2184                |
| p.I572T                                | c.1715T>C           | TMP_ESP_9_36222785 | -                      | 2/13006               | -                     | 2/13006               |
| p.G578C                                | c.1732G>T           | NA                 | -                      | -                     | 2/1434                | 2/1434                |
| p.E586A                                | c.1757A>C           | rs200212703        | 1/2184                 | -                     | -                     | 1/2184                |
| p.V603L                                | c.1807G>C           | rs121908632        | 1/2184                 | -                     | -                     | 1/2184                |
| p.L634F                                | c.1900C>T           | TMP_ESP_9_36219844 | -                      | 1/13006               | -                     | 1/13006               |
| p.A655V                                | c.1964C>T           | rs200278654        | -                      | 2/13006               | -                     | 2/13006               |
| p.R715S                                | c.2145C>A           | rs139347806        | -                      | 1/13006               | -                     | 1/13006               |
| p.R715C                                | c.2143C>T           | NA                 | -                      | -                     | 1/1434                | 1/1434                |
| <b>p.V727L</b>                         | <b>c.2179G&gt;T</b> | <b>rs121908627</b> | <b>-</b>               | <b>17/13006</b>       | <b>-</b>              | <b>17/13006</b>       |
| p.V727G                                | c.2180T>G           | rs142031240        | -                      | 1/4552*               | -                     | 1/4552                |
| p.V733A                                | c.2198T>C           | TMP_ESP_9_36217426 | -                      | 1/13006               | -                     | 1/13006               |
| p.A736T                                | c.2206G>A           | rs201216576        | 1/2184                 | -                     | -                     | 1/2184                |
| <b>Total alleles*</b>                  |                     |                    | <b>22/2184</b>         | <b>112/13006</b>      | <b>4/1434</b>         | <b>138/16624</b>      |
| <b>Total alleles without 3 SNPs</b>    |                     |                    | 10/2184                | 27/13006              | 4/1434                | 41/16624              |
| <b>q</b>                               |                     |                    | 0.00457875             | 0.00207596            | 0.0027894             | 0.00246631            |
| <b>Allele frequency without 3 SNPs</b> |                     |                    | <b>1/218</b>           | <b>1/482</b>          | <b>1/360</b>          | <b>1/406</b>          |
| <b>2pq</b>                             |                     |                    | 0.00915751             | 0.00415193            | 0.0055788             | 0.00493263            |
| <b>Carrier rate (heterozygotes)</b>    |                     |                    | <b>1/109</b>           | <b>1/241</b>          | <b>1/180</b>          | <b>1/203</b>          |
| <b>q<sup>2</sup></b>                   |                     |                    | 2.096*10 <sup>-5</sup> | 4.31*10 <sup>-6</sup> | 7.78*10 <sup>-6</sup> | 6.08*10 <sup>-6</sup> |
| <b>Prevalence of GNE myopathy</b>      |                     |                    | <b>1/47710</b>         | <b>1/232019</b>       | <b>1/128522</b>       | <b>1/164474</b>       |

NA, Not Available. Red highlight, variant identified in GNE myopathy patient (listed in Table 1); Green highlight, frequent variants, considered SNPs. Databases were searched for missense, nonsense and indel variants located within the coding region of hgNE2 (intronic variants were not included). Allele frequency and prevalence was calculated according to the Hardy-Weinberg equation ( $p^2 + 2pq + q^2 = 1$ ).

\*Total alleles were (conservatively) counted based on the highest number of alleles in each database. Total alleles were not adjusted (i.e., in ESP database 1/4552 was counted as 1 variant in 13006 alleles)
